# Supplementary material
Source: MDPI journal article supplement (https://www.mdpi.com/2071-1050/15/3/2401)
Supplement: s1 [file s1]

Table S1. Example of processed data and analysis of the investigated indicators of the selected transport company no. 9

|                                  |                     |
|----------------------------------|---------------------|
| <b>Transport company no. 9</b>   | <b>NACE 49410</b>   |
| <b>The company was founded</b>   | <b>22. 11. 2011</b> |
| <b>Number of employees</b>       | <b>50-99</b>        |
| <b>ISO 9001 certificate from</b> | <b>07. 11. 2014</b> |

| Transport company no. 9                               |           |           |           |           |           |           |           |           |           |         |         |
|-------------------------------------------------------|-----------|-----------|-----------|-----------|-----------|-----------|-----------|-----------|-----------|---------|---------|
| Year                                                  | 2020      | 2019      | 2018      | 2017      | 2016      | 2015      | 2014      | 2013      | 2012      | 2011    |         |
| EAT                                                   | 23 726    | 72 249    | 148 335   | 83 089    | 54 306    | 38 748    | 40 737    | 62 730    | -190 807  | -491    |         |
| EBIT                                                  | 23 726    | 81 849    | 188 081   | 106 030   | 58 403    | 41 819    | 43 858    | 62 730    | -170 807  | -491    |         |
| Total Assets                                          | 3 827 516 | 5 756 018 | 6 144 158 | 6 323 892 | 4 154 208 | 2077610   | 453 166   | 582 092   | 245 552   | 120 317 |         |
| Sales                                                 | 8 782 212 | 8 383 144 | 6 881 961 | 5 403 947 | 4 236 314 | 2 522 478 | 2 385 522 | 1 669 323 | 1 071 803 | 0       |         |
| Added value                                           | 1 924 163 | 1 817 286 | 1 656 649 | 1 316 520 | 905 461   | 180 878   | 100 588   | 112 168   | -159 915  | 109     |         |
| Personal expenses                                     | 981 539   | 928 399   | 709 052   | 491 855   | 311 580   | 173 884   | 153 000   | 95 606    | 78 128    | -109    |         |
| Number of years of existence of the transport company | 10        | 9         | 8         | 7         | 6         | 5         | 4         | 3         | 2         | 1       |         |
| Number of Community licenses issued                   | 100       | 80        | 63        | 52        | 42        | 32        | 32        | 19        | 19        | 19      |         |
| Average                                               |           |           |           |           |           |           |           |           |           |         |         |
| ROA 1 (EAT)                                           | 0.0062    | 0.0126    | 0.0241    | 0.0131    | 0.0131    | 0.0187    | 0.0899    | 0.1078    | -0.7771   | -0.0041 | -0.0496 |
| ROA 2 (EBIT)                                          | 0.0062    | 0.0142    | 0.0306    | 0.0168    | 0.0141    | 0.0201    | 0.0968    | 0.1078    | -0.6956   | -0.0041 | -0.0393 |
| ROS                                                   | 0.0027    | 0.0098    | 0.0273    | 0.0196    | 0.0138    | 0.0166    | 0.0184    | 0.0376    | -0.1594   | 0.0000  | -0.0014 |
| PP                                                    | 1.9604    | 1.9574    | 2.3364    | 2.6766    | 2.9060    | 1.0402    | 0.6574    | 1.1732    | -2.0468   | -1.0000 | 1.1661  |
| AGE                                                   | 1.0000    | 0.9542    | 0.9031    | 0.8451    | 0.7782    | 0.6990    | 0.6021    | 0.4771    | 0.3010    | 0.0000  | 0.6560  |
| SIZE                                                  | 6.5829    | 6.7601    | 6.7885    | 6.8010    | 6.6185    | 6.3176    | 5.6563    | 5.7650    | 5.3901    | 5.0803  | 6.1760  |
| ISO                                                   | 1         | 1         | 1         | 1         | 1         | 1         | 1         | 0         | 0         | 0       | -       |

| ROA EBIT  | 2020    | 2019    | 2018   | 2017    | 2016    | 2015   | 2014   | 2013    | 2012    | 2011   | 2010    | 2009    | ISO before | ISO after |
|-----------|---------|---------|--------|---------|---------|--------|--------|---------|---------|--------|---------|---------|------------|-----------|
| Company 1 | 0.0219  | -0.0662 | 0.0616 | -0.0589 | -0.0655 | 0.0346 | 0.0329 | -0.0040 | -0.0107 | 0.1358 | -0.1022 | -0.0472 | -0.0057    | -0.0056   |
| Company 2 | 0.2157  | 0.1296  | 0.1979 | 0.1797  | 0.0988  | 0.1265 | 0.1182 | 0.0579  | -       | -      | -       | -       | 0.0579     | 0.1523    |
| Company 3 | 0.0127  | -0.0154 | 0.0028 | 0.0680  | 0.0443  | 0.1014 | 0.0434 | 0.0360  | 0.0161  | 0.0736 | 0.0021  | 0.0158  | 0.0287     | 0.0367    |
| Company 4 | -0.0814 | -0.1392 | 0.0545 | 0.0934  | 0.1818  | 0.1848 | 0.1532 | 0.1019  | 0.7766  | 0.1424 | -0.5519 | -0.3562 | 0.0226     | 0.0639    |
| Company 5 | 0.0130  | 0.0078  | 0.0016 | -0.0080 | 0.0239  | 0.0284 | 0.0343 | 0.0202  | -0.0075 | -      | -       | -       | 0.0063     | 0.0144    |
| Company 6 | 0.0068  | 0.0311  | 0.0957 | 0.1451  | 0.1427  | 0.1547 | 0.2407 | 0.0758  | 0.1007  | 0.1207 | 0.2461  | -0.0160 | 0.1128     | 0.1116    |
| Company 7 | 0.1274  | 0.0874  | 0.0588 | 0.0926  | 0.1001  | 0.1863 | 0.1211 | 0.1133  | 0.0413  | 0.3571 | 0.1690  | -       | 0.1892     | 0.1109    |
| Company 8 | 0.0822  | 0.0737  | 0.1275 | 0.0988  | 0.0870  | 0.0989 | 0.0930 | 0.1211  | 0.1073  | 0.0999 | 0.0751  | 0.0045  | 0.0717     | 0.0978    |

|            |        |         |        |        |        |        |         |         |         |         |         |         |         |        |
|------------|--------|---------|--------|--------|--------|--------|---------|---------|---------|---------|---------|---------|---------|--------|
| Company 9  | 0.0062 | 0.0142  | 0.0306 | 0.0168 | 0.0141 | 0.0201 | 0.0968  | 0.1078  | -0.6956 | -0.0041 | -       | -       | -0.1973 | 0.0284 |
| Company 10 | 0.0881 | -0.0269 | 0.0313 | 0.0780 | 0.1062 | 0.1072 | 0.0771  | 0.0320  | 0.0632  | 0.0585  | 0.0079  | -       | 0.0404  | 0.0658 |
| Company 11 | 0.2059 | 0.1097  | 0.1435 | 0.1658 | 0.2205 | 0.1231 | 0.3004  | 0.0772  | 0.0436  | 0.0114  | 0.0225  | -0.0351 | 0.0239  | 0.1813 |
| Company 12 | 0.0605 | 0.0726  | 0.0063 | 0.0549 | 0.0162 | 0.0123 | -0.0712 | -0.0735 | -0.0787 | 0.1236  | 0.0738  | 0.0174  | 0.0125  | 0.0217 |
| Company 13 | 0.3388 | 0.0131  | 0.1135 | 0.1074 | 0.1543 | 0.2846 | 0.3086  | 0.0926  | 0.1099  | 0.0661  | 0.0224  | -       | 0.0728  | 0.1886 |
| Company 14 | 0.0596 | 0.0534  | 0.0114 | 0.0664 | 0.0601 | 0.0883 | 0.0584  | 0.0425  | 0.0372  | 0.0795  | 0.0509  | 0.0820  | 0.0624  | 0.0550 |
| Company 15 | 0.3092 | 0.1437  | 0.0921 | 0.1013 | 0.1353 | 0.1492 | 0.0021  | -0.0350 | 0.0140  | -1.0000 | -       | -       | -0.3403 | 0.1333 |
| Company 16 | 0.3388 | 0.0131  | 0.1135 | 0.1074 | 0.1543 | 0.2846 | 0.3086  | 0.0926  | 0.1099  | 0.0661  | 0.0224  | -       | 0.0728  | 0.1886 |
| Company 17 | 0.0877 | 0.0775  | 0.0323 | 0.1007 | 0.1386 | 0.1718 | 0.1882  | 0.1135  | 0.0746  | 0.0659  | 0.1042  | 0.0077  | 0.0631  | 0.1138 |
| Average    | 0.0633 | 0.0232  | 0.0677 | 0.0772 | 0.0808 | 0.0982 | 0.1033  | 0.0555  | 0.0324  | 0.1119  | -0.0064 | -0.0595 | 0.0173  | 0.0917 |
|            |        |         |        |        |        |        |         |         |         |         |         |         | SD      | 0.1160 |
|            |        |         |        |        |        |        |         |         |         |         |         |         | Ttest   | 0.0269 |

t-Test: Paired Two Sample for Means

|                              | Variable 1  | Variable 2  |
|------------------------------|-------------|-------------|
| Mean                         | 0.017283415 | 0.091671366 |
| Variance                     | 0.014307754 | 0.00397967  |
| Observations                 | 17          | 17          |
| Pearson Correlation          | 0.161170766 |             |
| Hypothesized Mean Difference | 0           |             |
| df                           | 16          |             |
|                              | -           |             |
| t Stat                       | 2.435807041 |             |
| P(T<=t) one-tail             | 0.013463125 |             |
| t Critical one-tail          | 1.745883676 |             |
| P(T<=t) two-tail             | 0.026926251 |             |
| t Critical two-tail          | 2.119905299 |             |

| ROS        | 2020    | 2019    | 2018   | 2017    | 2016    | 2015   | 2014    | 2013    | 2012    | 2011   | 2010    | 2009    | ISO before | ISO after |
|------------|---------|---------|--------|---------|---------|--------|---------|---------|---------|--------|---------|---------|------------|-----------|
| Company 1  | 0.0193  | -0.0341 | 0.0357 | -0.0250 | -0.0269 | 0.0172 | 0.0204  | -0.0019 | -0.0081 | 0.0748 | -0.0599 | -0.0212 | -0.0032    | 0.0009    |
| Company 2  | 0.1272  | 0.0796  | 0.1432 | 0.1131  | 0.0630  | 0.0812 | 0.0665  | 0.0323  | -       | -      | -       | -       | 0.0323     | 0.0963    |
| Company 3  | 0.0057  | -0.0054 | 0.0011 | 0.0249  | 0.0136  | 0.0398 | 0.0161  | 0.0139  | 0.0064  | 0.0298 | 0.0009  | 0.0097  | 0.0122     | 0.0137    |
| Company 4  | -0.0360 | -0.0614 | 0.0098 | 0.0196  | 0.0252  | 0.0367 | 0.0427  | 0.0388  | 0.0830  | 0.0214 | -0.0601 | -0.0835 | -0.0001    | 0.0052    |
| Company 5  | 0.0083  | 0.0042  | 0.0008 | -0.0045 | 0.0115  | 0.0149 | 0.0139  | 0.0135  | -0.0015 | -      | -       | -       | 0.0060     | 0.0070    |
| Company 6  | 0.0047  | 0.0181  | 0.0493 | 0.0763  | 0.0838  | 0.0685 | 0.1148  | 0.0392  | 0.0411  | 0.0499 | 0.0881  | -0.0296 | 0.0374     | 0.0569    |
| Company 7  | 0.0841  | 0.0564  | 0.0469 | 0.0674  | 0.0765  | 0.1010 | 0.0782  | 0.0557  | 0.0171  | 0.1328 | 0.4268  | -       | 0.1922     | 0.0708    |
| Company 8  | 0.0551  | 0.0408  | 0.0645 | 0.0503  | 0.0421  | 0.0551 | 0.0430  | 0.0480  | 0.0396  | 0.0419 | 0.0368  | 0.0022  | 0.0301     | 0.0499    |
| Company 9  | 0.0027  | 0.0098  | 0.0273 | 0.0196  | 0.0138  | 0.0166 | 0.0184  | 0.0376  | -0.1594 | -      | -       | -       | -0.0609    | 0.0155    |
| Company 10 | 0.0491  | -0.0163 | 0.0236 | 0.0691  | 0.1053  | 0.0892 | 0.0590  | 0.0285  | 0.0178  | 0.0209 | 0.0092  | -       | 0.0191     | 0.0541    |
| Company 11 | 0.1834  | 0.0894  | 0.1161 | 0.1160  | 0.1522  | 0.0689 | 0.1625  | 0.0399  | 0.0210  | 0.0054 | 0.0126  | -0.0200 | 0.0118     | 0.1269    |
| Company 12 | 0.0394  | 0.0540  | 0.0053 | 0.0564  | 0.0220  | 0.0242 | -0.1431 | -0.0106 | -0.0121 | 0.0268 | 0.0197  | 0.0085  | 0.0065     | 0.0083    |
| Company 13 | 0.1484  | 0.0057  | 0.0404 | 0.0433  | 0.0652  | 0.1190 | 0.1338  | 0.0330  | 0.0353  | 0.0219 | 0.0145  | -       | 0.0262     | 0.0794    |
| Company 14 | 0.0817  | 0.0560  | 0.0255 | 0.0840  | 0.0725  | 0.0892 | 0.0520  | 0.0413  | 0.0392  | 0.0593 | 0.0219  | 0.0378  | 0.0395     | 0.0628    |
| Company 15 | 0.1101  | 0.0424  | 0.0392 | 0.0398  | 0.0565  | 0.0684 | 0.0063  | -0.0072 | 0.0090  | -      | -       | -       | 0.0009     | 0.0518    |
| Company 16 | 0.1484  | 0.0057  | 0.0404 | 0.0433  | 0.0652  | 0.1190 | 0.1338  | 0.0330  | 0.0353  | 0.0219 | 0.0145  | -       | 0.0262     | 0.0794    |
| Company 17 | 0.0625  | 0.0393  | 0.0199 | 0.0576  | 0.0760  | 0.0947 | 0.1103  | 0.0732  | 0.0311  | 0.0303 | 0.0530  | 0.0049  | 0.0298     | 0.0667    |
| Average    | 0.0453  | 0.0196  | 0.0436 | 0.0486  | 0.0485  | 0.0511 | 0.0410  | 0.0279  | 0.0041  | 0.0449 | 0.0527  | -0.0192 | 0.0239     | 0.0497    |
|            |         |         |        |         |         |        |         |         |         |        |         | SD      | 0.0478     | 0.0353    |
|            |         |         |        |         |         |        |         |         |         |        |         | Ttest   | 0.0458     |           |

t-Test: Paired Two Sample for Means

|                              | Variable 1  | Variable 2  |
|------------------------------|-------------|-------------|
| Mean                         | 0.023877521 | 0.049737323 |
| Variance                     | 0.002429732 | 0.001327231 |
| Observations                 | 17          | 17          |
| Pearson Correlation          | 0.371390089 |             |
| Hypothesized Mean Difference | 0           |             |
| df                           | 16          |             |
|                              | -           |             |
| t Stat                       | 2.166029923 |             |
| P(T<=t) one-tail             | 0.022878265 |             |
| t Critical one-tail          | 1.745883676 |             |
| P(T<=t) two-tail             | 0.045756531 |             |

t Critical two-tail

2.119905299

| PP         | 2020   | 2019   | 2018   | 2017   | 2016   | 2015   | 2014   | 2013   | 2012    | 2011    | 2010   | 2009   | ISO before | ISO after |
|------------|--------|--------|--------|--------|--------|--------|--------|--------|---------|---------|--------|--------|------------|-----------|
| Company 1  | 2.1444 | 1.7443 | 2.2818 | 2.3114 | 2.0603 | 2.6886 | 2.4204 | 2.7043 | 1.9892  | 2.9193  | 2.7206 | 3.0544 | 2.6776     | 2.2359    |
| Company 2  | 3.1529 | 3.0998 | 4.0771 | 3.8696 | 3.6667 | 3.7438 | 3.4321 | 4.8752 | -       | -       | -      | -      | 4.8752     | 3.5774    |
| Company 3  | 1.3500 | 1.4251 | 1.3699 | 1.5586 | 1.6620 | 2.0744 | 2.0647 | 2.3229 | 2.6246  | 3.2757  | 4.8976 | 5.1895 | 3.6621     | 1.6435    |
| Company 4  | 1.2864 | 1.1003 | 1.5294 | 1.8091 | 2.3477 | 3.3152 | 3.0546 | 2.0463 | 2.5257  | 1.7629  | 1.3473 | 1.3030 | 1.7970     | 2.0633    |
| Company 5  | 2.3604 | 1.9104 | 1.9019 | 2.3334 | 2.6353 | 2.5115 | 2.2854 | 5.0500 | 5.0000  | -       | -      | -      | 5.0250     | 2.2769    |
| Company 6  | 1.7199 | 1.8262 | 1.9901 | 2.5117 | 2.2710 | 2.2950 | 3.0480 | 2.7890 | 2.5918  | 1.6881  | 1.6105 | 2.2789 | 2.0423     | 2.3064    |
| Company 7  | 2.5926 | 2.4527 | 2.4900 | 3.1922 | 2.8412 | 3.3935 | 4.3180 | 4.1770 | 3.3685  | 3.3103  | -      | -      | 3.3394     | 3.1822    |
| Company 8  | 3.2333 | 3.2090 | 3.4718 | 3.0990 | 2.9590 | 3.7409 | 4.0782 | 3.9704 | 4.2363  | 4.3581  | 4.7771 | 4.2133 | 4.3962     | 3.4702    |
| Company 9  | 1.9604 | 1.9574 | 2.3364 | 2.6766 | 2.9060 | 1.0402 | 0.6574 | 1.1732 | -2.0468 | -1.0000 | -      | -      | -0.6245    | 1.9335    |
| Company 10 | 2.6208 | 2.1886 | 2.3551 | 3.0523 | 3.8945 | 3.9873 | 4.0612 | 2.7978 | 2.3968  | 6.4261  | -      | -      | 3.8736     | 3.1657    |
| Company 11 | 2.7271 | 6.7738 | 3.0036 | 3.7048 | 3.9237 | 4.3250 | 4.9905 | 3.7478 | 3.4972  | 3.4155  | 3.2410 | 1.9460 | 3.1695     | 4.2069    |
| Company 12 | 1.7769 | 1.7996 | 1.7055 | 1.9577 | 1.8464 | 1.9092 | 0.7657 | 1.4544 | 1.8057  | 2.4918  | 2.6434 | 2.2241 | 2.1239     | 1.6801    |
| Company 13 | 2.9259 | 1.6056 | 2.1025 | 2.5365 | 2.7332 | 3.5461 | 3.1256 | 3.3069 | 2.9069  | 2.0033  | 2.5873 | -      | 2.7011     | 2.6536    |
| Company 14 | 2.8993 | 2.9184 | 2.3472 | 2.8702 | 2.4684 | 2.5561 | 1.9305 | 1.5106 | 1.4704  | 5.6284  | 8.7814 | 1.3276 | 4.3020     | 2.4376    |
| Company 15 | 3.1217 | 3.0565 | 3.6788 | 4.6163 | 4.8689 | 6.6623 | 4.6843 | 5.1000 | 3.7092  | -       | -      | -      | 4.4046     | 4.3841    |
| Company 16 | 2.9259 | 1.6056 | 2.1025 | 2.5365 | 2.7332 | 3.5461 | 3.1256 | 3.3069 | 2.9069  | 2.0033  | 2.5873 | -      | 2.7011     | 2.6536    |
| Company 17 | 2.5009 | 4.2288 | 4.0655 | 5.0686 | 6.4043 | 6.9209 | 6.8054 | 5.1677 | 3.3153  | 3.6448  | 4.2749 | 3.6897 | 3.7312     | 5.1453    |
| Average    | 2.2437 | 2.4573 | 2.3760 | 2.6730 | 2.7511 | 2.9187 | 2.9314 | 3.0924 | 2.5445  | 2.8648  | 3.0339 | 2.8870 | 3.1881     | 2.8833    |
|            |        |        |        |        |        |        |        |        |         |         |        | SD     | 1.3518     | 0.9732    |
|            |        |        |        |        |        |        |        |        |         |         |        | Ttest  | 0.3456     |           |

t-Test: Paired Two Sample for Means

|                              | Variable 1  | Variable 2  |
|------------------------------|-------------|-------------|
| Mean                         | 3.188071211 | 2.88330787  |
| Variance                     | 1.941544862 | 1.006221061 |
| Observations                 | 17          | 17          |
| Pearson Correlation          | 0.456462896 |             |
| Hypothesized Mean Difference | 0           |             |
| df                           | 16          |             |
| t Stat                       | 0.971854934 |             |
| P(T<=t) one-tail             | 0.172793405 |             |

|                     |             |
|---------------------|-------------|
| t Critical one-tail | 1.745883676 |
| P(T<=t) two-tail    | 0.34558681  |
| t Critical two-tail | 2.119905299 |

| AGE        | 2020   | 2019   | 2018   | 2017   | 2016   | 2015   | 2014   | 2013   | 2012   | 2011   | 2010   | 2009   | ISO before | ISO after |
|------------|--------|--------|--------|--------|--------|--------|--------|--------|--------|--------|--------|--------|------------|-----------|
| Company 1  | 1.2304 | 1.2041 | 1.1761 | 1.1461 | 1.1139 | 1.0792 | 1.0000 | 0.9542 | 0.9031 | 0.8451 | 0.7782 | 0.6990 | 0.8359     | 1.1357    |
| Company 2  | 0.9031 | 0.8451 | 0.7782 | 0.6990 | 0.6021 | 0.4771 | 0.3010 | 0.0000 | -      | -      | -      | -      | 0.0000     | 0.6579    |
| Company 3  | 1.4314 | 1.4150 | 1.3979 | 1.3802 | 1.3617 | 1.3424 | 1.3222 | 1.3010 | 1.2788 | 1.2553 | 1.2304 | 1.2041 | 1.2539     | 1.3787    |
| Company 4  | 1.0792 | 1.0414 | 1.0000 | 0.9542 | 0.9031 | 0.8451 | 0.7782 | 0.6990 | 0.6021 | 0.4771 | 0.3010 | -      | 0.5198     | 0.9430    |
| Company 5  | 0.9542 | 0.9031 | 0.8451 | 0.7782 | 0.6990 | 0.6021 | 0.4771 | 0.3010 | -      | -      | -      | -      | 0.3010     | 0.7512    |
| Company 6  | 1.0792 | 1.0414 | 1.0000 | 0.9542 | 0.9031 | 0.8451 | 0.7782 | 0.6990 | 0.6021 | 0.4771 | 0.3010 | -      | 0.4601     | 0.9125    |
| Company 7  | 1.0792 | 1.0414 | 1.0000 | 0.9542 | 0.9031 | 0.8451 | 0.7782 | 0.6990 | 0.6021 | 0.4771 | 0.3010 | -      | 0.4601     | 0.9125    |
| Company 8  | 1.2553 | 1.2304 | 1.2041 | 1.1761 | 1.1461 | 1.1139 | 1.0792 | 1.0414 | 1.0000 | 0.9542 | 0.9031 | 0.8451 | 0.9256     | 1.1558    |
| Company 9  | 1.0000 | 0.9542 | 0.9031 | 0.8451 | 0.7782 | 0.6990 | 0.6021 | 0.4771 | 0.3010 | -      | -      | -      | 0.3891     | 0.8259    |
| Company 10 | 1.0414 | 1.0000 | 0.9542 | 0.9031 | 0.8451 | 0.7782 | 0.6990 | 0.6021 | 0.4771 | 0.3010 | -      | -      | 0.4601     | 0.8887    |
| Company 11 | 1.2041 | 1.1761 | 1.1461 | 1.1139 | 1.0792 | 1.0414 | 1.0000 | 0.9542 | 0.9031 | 0.8451 | 0.7782 | 0.6990 | 0.8359     | 1.1087    |
| Company 12 | 1.1761 | 1.1461 | 1.1139 | 1.0792 | 1.0414 | 1.0000 | 0.9542 | 0.8451 | 0.7782 | 0.6990 | 0.6021 | 0.4771 | 0.6803     | 1.0730    |
| Company 13 | 1.5798 | 1.5798 | 1.5798 | 1.5798 | 1.5798 | 1.5798 | 1.4150 | 1.4150 | 1.4150 | 1.4150 | 1.4150 | -      | 1.4150     | 1.5562    |
| Company 14 | 1.2041 | 1.1761 | 1.1461 | 1.1139 | 1.0792 | 1.0414 | 1.0000 | 0.9542 | 0.9031 | 1.6713 | 1.2902 | 0.6990 | 1.1409     | 1.0894    |
| Company 15 | 0.9542 | 0.9031 | 0.8451 | 0.7782 | 0.6990 | 0.6021 | 0.4771 | 0.3010 | 0.0000 | -      | -      | -      | 0.1505     | 0.7512    |
| Company 16 | 1.0414 | 1.0000 | 0.9542 | 0.9031 | 0.8451 | 0.7782 | 0.6990 | 0.6021 | 0.4771 | 0.3010 | 0.0000 | -      | 0.3451     | 0.8887    |
| Company 17 | 1.1461 | 1.1139 | 1.0792 | 1.0414 | 1.0000 | 0.9542 | 0.9031 | 0.8451 | 0.7782 | 0.6990 | 0.6021 | 0.4771 | 0.6391     | 1.0104    |
| Average    | 1.1195 | 1.0832 | 1.0432 | 0.9986 | 0.9480 | 0.8890 | 0.8141 | 0.7144 | 0.7447 | 0.7035 | 0.6494 | 0.7849 | 0.6360     | 1.0023    |
|            |        |        |        |        |        |        |        |        |        |        |        | SD     | 0.3768     | 0.2216    |
|            |        |        |        |        |        |        |        |        |        |        |        | Ttest  | 0.0000003  |           |

t-Test: Paired Two Sample for Means

|                              | Variable 1  | Variable 2  |
|------------------------------|-------------|-------------|
| Mean                         | 0.636014929 | 1.002338684 |
| Variance                     | 0.150855803 | 0.052190152 |
| Observations                 | 17          | 17          |
| Pearson Correlation          | 0.960534769 |             |
| Hypothesized Mean Difference | 0           |             |
| df                           | 16          |             |

|                     |             |
|---------------------|-------------|
|                     | -           |
| t Stat              | 8.366880657 |
| P(T<=t) one-tail    | 1.54234E-07 |
| t Critical one-tail | 1.745883676 |
| P(T<=t) two-tail    | 3.08469E-07 |
| t Critical two-tail | 2.119905299 |

---
